# Supplementary material for: Co-administration of prism adaptation and methylphenidate needs striatal integrity to alleviate spatial neglect
Source: bioRxiv or medRxiv preprint supplement (doi:10.1101/2023.01.12.23284487), 2023-01-17
Supplement: Supplementary file [file media-1.pdf]

## Supplementary material: delineation protocol

### Anterior caudate nucleus (left and right)

| Orientation of slices | Coronal                                                                  |
|-----------------------|--------------------------------------------------------------------------|
| Anterior border       | Most anterior slice when the caudate nucleus is seen                     |
| Posterior border      | Last slice on which the anterior commissure is completely visualized     |
| Superior border       | White matter                                                             |
| Inferior border       | From anterior to posterior: white matter, ventral striatum, white matter |
| Medial border         | White matter                                                             |
| Lateral border        | White matter                                                             |

### Anterior putamen (left and right)

| Orientation of slices | Coronal                                                                     |
|-----------------------|-----------------------------------------------------------------------------|
| Anterior border       | Most anterior slice when the caudate nucleus is seen                        |
| Posterior border      | Last slice on which the anterior commissure is completely visualized        |
| Superior border       | White matter                                                                |
| Inferior border       | White matter                                                                |
| Medial border         | From anterior to posterior: internal capsule and ventral striatum, pallidum |
| Lateral border        | White matter                                                                |

### Ventral striatum (left and right)

The ventral striatum corresponds to the ventro-medial portion of the caudate nucleus and most ventral and medial part of the putamen (Haber, 2003).

| Orientation of slices | Coronal                                                                      |
|-----------------------|------------------------------------------------------------------------------|
| Anterior border       | First slice when the inferior part of the caudate nucleus is visible         |
| Posterior border      | Last slice on which the anterior commissure is completely visualized         |
| Superior border       | Anterior striatum (ventral striatum is always inferior to lateral ventricle) |
| Inferior border       | From anterior to posterior: white matter, anterior commissure                |

**Co-administration of prism adaptation and methylphenidate needs striatal integrity to alleviate spatial neglect**

|                |                                 |
|----------------|---------------------------------|
| Medial border  | Lateral ventricle, white matter |
| Lateral border | White matter                    |

**Posterior caudate nucleus (left and right)**

| <b>Orientation of slices</b> | <b>Coronal</b>                                                   |
|------------------------------|------------------------------------------------------------------|
| Anterior border              | Anterior caudate nucleus                                         |
| Posterior border             | Last slice when visible                                          |
| Superior border              | White matter                                                     |
| Inferior border              | From anterior to posterior: white matter, thalamus, white matter |
| Medial border                | Lateral ventricle                                                |
| Lateral border               | White matter                                                     |

**Posterior putamen**

| <b>Orientation of slices</b> | <b>Coronal</b>                                                   |
|------------------------------|------------------------------------------------------------------|
| Anterior border              | Anterior putamen                                                 |
| Posterior border             | Last slice when visible                                          |
| Superior border              | White matter                                                     |
| Inferior border              | White matter                                                     |
| Medial border                | From anterior to posterior: white matter, pallidum, white matter |
| Lateral border               | White matter                                                     |
